# Supplementary material for: Cytotoxic Function and Cytokine Production of Natural Killer Cells and Natural Killer T-Like Cells in Systemic Lupus Erythematosis Regulation with Interleukin-15
Source: Hindawi journal article supplement (doi:10.1155/2019/4236562), 2019-03-31
Supplement: f2 [file 4236562.f2.pdf]

Figure 2(a)

CD56+CD3- NK cell (%)

| Normal |       | Inactive SLE |       | Active SLE |       |
|--------|-------|--------------|-------|------------|-------|
| Media  | IL-15 | Media        | IL-15 | Media      | IL-15 |
| 9.1    | 11.6  | 3.2          | 5.7   | 5.4        | 4.9   |
| 10.4   | 10.7  | 1.2          | 2.3   | 3.2        | 3.8   |
| 3.1    | 5     | 5.6          | 7.1   | 7.5        | 8.3   |
| 6.5    | 13    | 2.3          | 4.6   | 4.6        | 5.6   |
| 7.4    | 6.3   | 1.9          | 2.6   | 8.2        | 9.1   |
| 7.5    | 6.9   | 2.7          | 2.7   | 3.9        | 5.1   |
| 11     | 12.7  | 2.8          | 3.0   | 9.1        | 10.1  |
| 16.8   | 13.1  | 1.5          | 1.7   | 2.4        | 3.2   |
| 15.8   | 10.3  | 4.4          | 5.1   | 2.4        | 2.7   |
| 4.1    | 4     | 6.8          | 8.5   | 7.6        | 8.1   |
| 3.1    | 4.3   | 6.4          | 8.3   | 2.4        | 2.8   |
| 4.5    | 4.4   | 2.4          | 3.9   | 7          | 6.5   |
| 13.2   | 14.9  | 1.7          | 7.0   | 2.9        | 3.6   |
| 5.7    | 6.6   | 4.3          | 5.5   | 4.7        | 4.5   |
| 7.8    | 8.5   | 4.7          | 4.9   | 9.6        | 8.4   |
| 9.2    | 10.4  |              |       | 3.3        | 3.4   |
| 11.3   | 9.5   |              |       | 10.1       | 8.7   |
| 12.5   | 10.3  |              |       | 3.4        | 4.3   |
| 14     | 15    |              |       | 8.1        | 7     |
|        |       |              |       | 5.6        | 6.9   |
|        |       |              |       | 6.2        | 6.7   |
|        |       |              |       |            |       |
