# Supplementary material for: Cytotoxic Function and Cytokine Production of Natural Killer Cells and Natural Killer T-Like Cells in Systemic Lupus Erythematosis Regulation with Interleukin-15
Source: Hindawi journal article supplement (doi:10.1155/2019/4236562), 2019-03-31
Supplement: f3 [file 4236562.f3.pdf]

Figure 2(b)

CD56dim NK cell (%)

| Normal |       |  | Inactive SLE |       |  | Active SLE |       |
|--------|-------|--|--------------|-------|--|------------|-------|
| Media  | IL-15 |  | Media        | IL-15 |  | Media      | IL-15 |
| 96.7   | 89.7  |  | 75.9         | 69.4  |  | 94.7       | 80.7  |
| 72.6   | 75.0  |  | 82.4         | 40.1  |  | 70.8       | 44.2  |
| 94.2   | 92.5  |  | 80.6         | 68.9  |  | 84.2       | 50.6  |
| 96.9   | 98.5  |  | 88.1         | 90.3  |  | 81.7       | 54.7  |
| 75.7   | 66.7  |  | 82.1         | 65.9  |  | 78.4       | 51.4  |
| 88.0   | 53.6  |  | 86.0         | 79.3  |  | 72.1       | 73.1  |
| 76.2   | 70.9  |  | 68.8         | 26.7  |  | 92.9       | 84.0  |
| 94.6   | 76.4  |  | 75.9         | 57.4  |  | 68.2       | 79.8  |
| 59.5   | 49.6  |  | 96.7         | 87.0  |  | 50.0       | 66.7  |
| 81.0   | 40.8  |  | 92.1         | 97.8  |  | 67.8       | 67.0  |
| 93.3   | 88.6  |  | 84.3         | 83.1  |  | 69.9       | 46.8  |
| 95.5   | 67.1  |  | 87.2         | 87.2  |  | 81.8       | 72.0  |
| 91.2   | 66.7  |  | 94.7         | 92.3  |  | 87.5       | 90.1  |
| 93.6   | 69.4  |  | 43.9         | 70.9  |  | 76.9       | 71.4  |
| 92.4   | 79.8  |  |              |       |  | 91.2       | 72.3  |
| 89.4   | 61.1  |  |              |       |  | 89.3       | 68.5  |
| 92.0   | 76.7  |  |              |       |  | 87.5       | 65.6  |
| 96.4   | 81.3  |  |              |       |  | 80.4       | 50.7  |
|        |       |  |              |       |  | 85.7       | 68.1  |
|        |       |  |              |       |  |            |       |
|        |       |  |              |       |  |            |       |
|        |       |  |              |       |  |            |       |

**CD56bright NK cell (%)**

| Normal |       |  | Inactive SLE |       |  | Active SLE |       |
|--------|-------|--|--------------|-------|--|------------|-------|
| Media  | IL-15 |  | Media        | IL-15 |  | Media      | IL-15 |
| 3.3    | 10.3  |  | 24.1         | 30.6  |  | 5.3        | 19.3  |
| 27.4   | 25.0  |  | 17.7         | 59.9  |  | 29.3       | 55.8  |
| 5.8    | 7.5   |  | 19.4         | 31.1  |  | 15.9       | 49.5  |
| 3.1    | 1.5   |  | 11.9         | 9.7   |  | 18.3       | 45.3  |
| 24.3   | 33.3  |  | 18.0         | 34.2  |  | 21.6       | 48.6  |
| 12.0   | 46.4  |  | 14.0         | 20.7  |  | 27.9       | 26.9  |
| 23.8   | 29.1  |  | 31.2         | 73.3  |  | 7.1        | 16.0  |
| 5.5    | 23.6  |  | 24.1         | 42.6  |  | 31.9       | 20.2  |
| 40.5   | 50.4  |  | 3.3          | 13.0  |  | 50.0       | 33.3  |
| 19.0   | 59.2  |  | 7.9          | 2.2   |  | 32.2       | 33.0  |
| 6.7    | 11.4  |  | 15.7         | 16.9  |  | 30.1       | 53.2  |
| 4.6    | 32.9  |  | 12.8         | 12.8  |  | 18.2       | 28.0  |
| 8.8    | 33.3  |  | 5.3          | 7.7   |  | 12.5       | 9.9   |
| 6.4    | 30.6  |  | 56.1         | 29.1  |  | 23.1       | 28.6  |
| 7.6    | 20.2  |  |              |       |  | 8.8        | 27.7  |
| 10.6   | 39.0  |  |              |       |  | 10.7       | 31.5  |
| 8.0    | 23.3  |  |              |       |  | 12.5       | 34.4  |
| 3.6    | 18.7  |  |              |       |  | 19.6       | 49.3  |
|        |       |  |              |       |  | 14.3       | 31.9  |
|        |       |  |              |       |  |            |       |
|        |       |  |              |       |  |            |       |
|        |       |  |              |       |  |            |       |
