# Supplementary material for: Cytotoxic Function and Cytokine Production of Natural Killer Cells and Natural Killer T-Like Cells in Systemic Lupus Erythematosis Regulation with Interleukin-15
Source: Hindawi journal article supplement (doi:10.1155/2019/4236562), 2019-03-31
Supplement: f5 [file 4236562.f5.pdf]

Figure 3(b)

Granzyme B

| Normal |       |  | Inactive SLE |       |  | Active SLE |       |
|--------|-------|--|--------------|-------|--|------------|-------|
| Media  | IL-15 |  | Media        | IL-15 |  | Media      | IL-15 |
| 962    | 1014  |  | 1194         | 2426  |  | 789        | 857   |
| 897    | 1368  |  | 785          | 995   |  | 918        | 1183  |
| 764    | 1102  |  | 1314         | 1465  |  | 797        | 887   |
| 769    | 921   |  | 2180         | 2443  |  | 740        | 832   |
| 615    | 674   |  | 1139         | 1407  |  | 1071       | 1440  |
| 660    | 641   |  | 807          | 1033  |  | 1078       | 1791  |
| 722    | 704   |  | 919          | 2058  |  | 1416       | 2054  |
| 649    | 682   |  | 678          | 667   |  | 2011       | 2234  |
| 1303   | 1558  |  | 553          | 622   |  | 1568       | 1545  |
| 764    | 941   |  | 602          | 1258  |  | 14947      | 27714 |
| 1083   | 1518  |  | 1093         | 1482  |  | 15102      | 24458 |
| 1092   | 1254  |  |              |       |  | 9084       | 15152 |
| 809    | 1033  |  |              |       |  | 13486      | 16370 |
| 1374   | 1603  |  |              |       |  | 7088       | 38841 |
|        |       |  |              |       |  | 9016       | 13956 |
|        |       |  |              |       |  |            |       |
|        |       |  |              |       |  |            |       |
|        |       |  |              |       |  |            |       |
