# Supplementary material for: Cytotoxic Function and Cytokine Production of Natural Killer Cells and Natural Killer T-Like Cells in Systemic Lupus Erythematosis Regulation with Interleukin-15
Source: Hindawi journal article supplement (doi:10.1155/2019/4236562), 2019-03-31
Supplement: f7 [file 4236562.f7.pdf]

Figure 4(b)

TNF-alpha

| Normal |       |  | Inactive SLE |       |  | Active SLE |       |
|--------|-------|--|--------------|-------|--|------------|-------|
| Media  | IL-15 |  | Media        | IL-15 |  | Media      | IL-15 |
| 74.7   | 84.6  |  | 73.5         | 86.4  |  | 21.4       | 59.8  |
| 74.3   | 83.2  |  | 67.6         | 78.2  |  | 28.3       | 42    |
| 66.2   | 67.1  |  | 81.1         | 87.6  |  | 29.7       | 65.7  |
| 50.7   | 51.2  |  | 67.4         | 80.7  |  | 27.6       | 54.4  |
| 73.9   | 79.5  |  | 88.1         | 92.9  |  | 62.3       | 70.3  |
| 66.7   | 88.5  |  | 67.6         | 72.1  |  | 57.6       | 73.1  |
| 71.8   | 74.8  |  |              |       |  | 41.8       | 55.8  |
| 68.8   | 72.8  |  |              |       |  | 70.7       | 86.8  |
| 76     | 64.4  |  |              |       |  | 34.8       | 68.7  |
| 74.6   | 64.9  |  |              |       |  | 80.5       | 87    |
| 66.4   | 83.6  |  |              |       |  | 73.1       | 76.4  |
| 76.1   | 81.5  |  |              |       |  |            |       |
| 64.5   | 84    |  |              |       |  |            |       |
| 91.3   | 95    |  |              |       |  |            |       |
| 86.3   | 90.4  |  |              |       |  |            |       |
| 86.5   | 93.1  |  |              |       |  |            |       |
|        |       |  |              |       |  |            |       |
