# Supplementary material for: Cytotoxic Function and Cytokine Production of Natural Killer Cells and Natural Killer T-Like Cells in Systemic Lupus Erythematosis Regulation with Interleukin-15
Source: Hindawi journal article supplement (doi:10.1155/2019/4236562), 2019-03-31
Supplement: f8 [file 4236562.f8.pdf]

Figure 5(a)

Perforin

| Normal |       |  | Inactive SLE |       |  | Active SLE |       |
|--------|-------|--|--------------|-------|--|------------|-------|
| Media  | IL-15 |  | Media        | IL-15 |  | Media      | IL-15 |
| 1850   | 3000  |  | 1316         | 4652  |  | 2784       | 4741  |
| 3296   | 10221 |  | 3006         | 5658  |  | 5991       | 6592  |
| 760    | 820   |  | 4809         | 5393  |  | 1871       | 4894  |
| 1083   | 2410  |  | 2176         | 3810  |  | 6799       | 11369 |
| 1511   | 3225  |  | 1102         | 2479  |  | 6180       | 10584 |
| 1468   | 5011  |  | 9196         | 10973 |  | 2369       | 7724  |
| 2557   | 5390  |  | 2020         | 10638 |  | 11314      | 16989 |
| 2825   | 6639  |  | 1465         | 2808  |  | 1145       | 1859  |
| 6711   | 9418  |  | 2423         | 5368  |  | 8792       | 18361 |
| 6971   | 12085 |  | 5713         | 11756 |  | 5136       | 3056  |
| 1795   | 4988  |  | 6850         | 1758  |  | 10183      | 12478 |
| 1992   | 4913  |  | 3553         | 5298  |  | 5145       | 7664  |
|        |       |  | 5024         | 9742  |  | 8637       | 12037 |
|        |       |  |              |       |  | 10336      | 13041 |
|        |       |  |              |       |  |            |       |
