# Supplementary material for: Cytotoxic Function and Cytokine Production of Natural Killer Cells and Natural Killer T-Like Cells in Systemic Lupus Erythematosis Regulation with Interleukin-15
Source: Hindawi journal article supplement (doi:10.1155/2019/4236562), 2019-03-31
Supplement: f10 [file 4236562.f10.pdf]

Figure 6(a)

IFN-gamma

| Normal |       |  | Inactive SLE |       |  | Active SLE |       |
|--------|-------|--|--------------|-------|--|------------|-------|
| Media  | IL-15 |  | Media        | IL-15 |  | Media      | IL-15 |
| 64.7   | 71    |  | 57.8         | 63.4  |  | 95.1       | 96.4  |
| 70.9   | 39.2  |  | 73.7         | 70.3  |  | 86.5       | 84.7  |
| 75.3   | 22.3  |  | 71.8         | 67.9  |  | 98.5       | 98.6  |
| 75.8   | 88.2  |  | 71.4         | 92.4  |  | 85         | 92.6  |
| 88     | 75.3  |  | 67.6         | 76.7  |  | 63.5       | 70.1  |
| 61     | 73.9  |  | 88.2         | 88.2  |  | 44.9       | 60.6  |
| 76.6   | 92.1  |  | 69           | 84.5  |  | 88.9       | 92.6  |
| 85.2   | 92    |  | 78.2         | 96    |  | 82.1       | 88.2  |
| 60.6   | 61.4  |  | 71.6         | 84.8  |  | 58.7       | 83.5  |
| 53     | 76.1  |  |              |       |  | 80.8       | 86.3  |
| 69     | 79.8  |  |              |       |  | 44.9       | 31    |
| 58.3   | 89.3  |  |              |       |  | 88.5       | 91.1  |
| 86.4   | 92.8  |  |              |       |  | 83.4       | 86.7  |
| 86     | 88    |  |              |       |  |            |       |
|        |       |  |              |       |  |            |       |
