# Supplementary material for: Cytotoxic Function and Cytokine Production of Natural Killer Cells and Natural Killer T-Like Cells in Systemic Lupus Erythematosis Regulation with Interleukin-15
Source: Hindawi journal article supplement (doi:10.1155/2019/4236562), 2019-03-31
Supplement: f11 [file 4236562.f11.pdf]

Figure 6(b)

TNF-alpha

| Normal |       |  | Inactive SLE |       |  | Active SLE |       |
|--------|-------|--|--------------|-------|--|------------|-------|
| Media  | IL-15 |  | Media        | IL-15 |  | Media      | IL-15 |
| 87.7   | 90.9  |  | 64.1         | 88.2  |  | 63.2       | 71.2  |
| 84.4   | 89.4  |  | 76.7         | 77.5  |  | 38.9       | 51.6  |
| 75.9   | 91.4  |  | 88.6         | 87.7  |  | 55.3       | 88    |
| 87.3   | 85    |  | 72.5         | 83.9  |  | 66.8       | 59.1  |
| 84     | 91.6  |  | 81.1         | 87.6  |  | 84.7       | 90.6  |
| 89.5   | 93    |  | 75.6         | 84.8  |  | 68.5       | 83.3  |
| 84.6   | 77.4  |  |              |       |  | 58.8       | 83.2  |
| 80.2   | 61.5  |  |              |       |  | 74.3       | 88    |
| 77.4   | 91.8  |  |              |       |  | 36.1       | 62.4  |
| 87.4   | 92.6  |  |              |       |  | 86.9       | 90.5  |
| 90.2   | 97.1  |  |              |       |  | 89.1       | 87.9  |
| 95.7   | 95.6  |  |              |       |  |            |       |
| 94.5   | 95.3  |  |              |       |  |            |       |
| 95.8   | 96.8  |  |              |       |  |            |       |
|        |       |  |              |       |  |            |       |
