# Supplementary material for: Cytotoxic Function and Cytokine Production of Natural Killer Cells and Natural Killer T-Like Cells in Systemic Lupus Erythematosis Regulation with Interleukin-15
Source: Hindawi journal article supplement (doi:10.1155/2019/4236562), 2019-03-31
Supplement: f14 [file 4236562.f14.pdf]

IFN-gamma-%

| CD56dim |       |              |       |            |       |
|---------|-------|--------------|-------|------------|-------|
| Normal  |       | Inactive SLE |       | Active SLE |       |
| Media   | IL-15 | Media        | IL-15 | Media      | IL-15 |
| 85.7    | 89.2  | 60.4         | 66.1  | 70.4       | 84.1  |
| 61.3    | 52.5  | 58.8         | 64.2  | 88.8       | 92.4  |
| 75.1    | 72.9  | 78.6         | 85.3  | 96.9       | 99.4  |
| 61.9    | 68.7  | 51.3         | 65.1  | 93.3       | 98.7  |
| 57      | 89.4  | 57.9         | 64.8  | 58.4       | 64.1  |
| 78      | 75.5  | 83.1         | 88.7  | 51.8       | 60.7  |
| 51.4    | 61.6  | 76           | 89.3  | 83         | 88.3  |
| 61.3    | 63.7  | 79.9         | 87.3  | 89.5       | 93.3  |
| 84.8    | 86.0  | 82.2         | 91.1  | 76.6       | 81.4  |
| 78.4    | 80.3  | 63.8         | 69.3  | 88.6       | 89.4  |
| 58.2    | 61.3  |              |       | 66.7       | 76.5  |
| 55.1    | 61.6  |              |       |            |       |
| 60.8    | 69.5  |              |       |            |       |
| 65.7    | 75.8  |              |       |            |       |
| 55.5    | 68.2  |              |       |            |       |
| 73.1    | 82.5  |              |       |            |       |
| 87.4    | 93.1  |              |       |            |       |

**IFN-gamma-%**

| CD56bright |       |              |       |            |       |
|------------|-------|--------------|-------|------------|-------|
| Normal     |       | Inactive SLE |       | Active SLE |       |
| Media      | IL-15 | Media        | IL-15 | Media      | IL-15 |
| 84         | 62    | 62.9         | 60    |            | 100   |
| 65.7       | 77.8  | 88.9         |       | 83.3       | 100   |
| 52.5       | 67.4  | 87           | 98.5  | 100        | 100   |
| 64.8       | 65.6  | 22.6         | 13.3  | 100        | 100   |
| 70         | 94.0  | 56.7         | 91.3  | 81         | 73.5  |
| 75         | 74.8  | 89.2         | 91.7  | 50         | 62.2  |
| 24.2       | 48.3  | 55           | 68.9  | 95.7       | 100   |
| 46.3       | 52.4  | 71.4         | 76.9  | 15         | 91.7  |
| 92.3       | 98.8  | 85.7         | 84.6  | 92.6       | 98.6  |
| 70.4       | 81.5  | 74.2         | 64.6  | 100        | 99    |
| 80.0       | 95.2  |              |       | 61.9       | 53.7  |
| 74.2       | 81.5  |              |       |            |       |
| 74.2       | 79.5  |              |       |            |       |
| 83.4       | 94.5  |              |       |            |       |
| 64.2       | 94.1  |              |       |            |       |
| 88.4       | 98.5  |              |       |            |       |
| 85.1       | 95.9  |              |       |            |       |

TNF-alpha-%

| CD56dim |       |              |       |            |       |
|---------|-------|--------------|-------|------------|-------|
| Normal  |       | Inactive SLE |       | Active SLE |       |
| Media   | IL-15 | Media        | IL-15 | Media      | IL-15 |
| 75.8    | 85.3  | 74.3         | 86.6  | 14.2       | 57.8  |
| 81.2    | 83.8  | 69.5         | 78.3  | 26.3       | 42.8  |
| 66.3    | 66.7  | 81.7         | 87.8  | 28.7       | 64.3  |
| 50.2    | 51.3  | 68           | 81.4  | 25.2       | 54.6  |
| 74.1    | 77.6  | 88.7         | 93    | 62         | 69.9  |
| 67      | 88.9  | 67.6         | 72.3  | 58.4       | 73.6  |
| 72.2    | 74.9  |              |       | 49.4       | 61    |
| 68.9    | 72.9  |              |       | 71.5       | 86.9  |
| 76      | 64.4  |              |       | 35.7       | 68.8  |
| 74.8    | 65.1  |              |       | 81.3       | 86.7  |
| 66.5    | 83.4  |              |       | 62.9       | 78.1  |
| 76.3    | 81.4  |              |       |            |       |
| 64.8    | 83.4  |              |       |            |       |
| 91.5    | 94.4  |              |       |            |       |
| 86      | 89.7  |              |       |            |       |
| 87.4    | 92.6  |              |       |            |       |
|         |       |              |       |            |       |

TNF-alpha-%

| CD56bright |       |              |       |            |       |
|------------|-------|--------------|-------|------------|-------|
| Normal     |       | Inactive SLE |       | Active SLE |       |
| Media      | IL-15 | Media        | IL-15 | Media      | IL-15 |
| 61.9       | 77.6  | 40           | 84    | 100        | 100   |
| 83.9       | 93    | 67.5         | 74.8  | 83.3       | 100   |
| 70.9       | 69.9  | 76.7         | 89.7  | 100        | 100   |
| 53.9       | 38    |              | 88.9  | 100        | 100   |
| 73.2       | 86.6  | 76.6         | 84.6  | 57.1       | 79.6  |
| 56.5       | 86.7  | 74.2         | 81.9  | 68.8       | 80.7  |
| 59.5       | 81.5  |              |       | 23.5       | 13.3  |
| 82.3       | 91.1  |              |       | 71.4       | 92.6  |
| 76.9       | 80.8  |              |       |            | 100   |
| 69.8       | 73.3  |              |       | 71.4       | 76.9  |
| 73.6       | 93.7  |              |       | 61.9       | 53.7  |
| 71.1       | 93    |              |       |            |       |
| 79.2       | 94.9  |              |       |            |       |
| 90.1       | 97.8  |              |       |            |       |
| 85.6       | 92.4  |              |       |            |       |
| 79.8       | 95.2  |              |       |            |       |
|            |       |              |       |            |       |
