# Supplementary material for: Cytotoxic Function and Cytokine Production of Natural Killer Cells and Natural Killer T-Like Cells in Systemic Lupus Erythematosis Regulation with Interleukin-15
Source: Mediators Inflamm. 2019 Mar 31;2019:4236562. doi: 10.1155/2019/4236562 (PMC6462338; doi:10.1155/2019/4236562)
Supplement: Supplementary 4 — Figure 3(a): comparison of the MFI of perforin of NK cells from peripheral blood of SLE patients (active and inactive) and healthy controls (normal) in the presence and absence of IL-15. [file 4236562.f4.pdf]

**Figure 3(a)**

**Peforin**

| Normal |       |  | Inactive SLE |       |  | Active SLE |       |
|--------|-------|--|--------------|-------|--|------------|-------|
| Media  | IL-15 |  | Media        | IL-15 |  | Media      | IL-15 |
| 7907   | 13794 |  | 1320         | 3750  |  | 1356       | 1971  |
| 47193  | 43033 |  | 2688         | 3343  |  | 1141       | 3085  |
| 28974  | 46687 |  | 28893        | 13511 |  | 3696       | 5156  |
| 4633   | 9381  |  | 45533        | 50261 |  | 8806       | 15484 |
| 6031   | 11215 |  | 4530         | 7465  |  | 2600       | 4048  |
| 16045  | 19453 |  | 6868         | 13586 |  | 9080       | 15237 |
| 17308  | 21536 |  | 8567         | 21894 |  | 6940       | 13517 |
| 11337  | 11902 |  | 1085         | 2259  |  | 6629       | 10337 |
| 3368   | 8010  |  | 4069         | 5662  |  | 30055      | 33586 |
| 4529   | 10071 |  | 5225         | 19227 |  | 13157      | 21069 |
| 25732  | 39854 |  | 39260        | 57865 |  | 7818       | 3791  |
| 13631  | 19313 |  | 11791        | 14888 |  | 5188       | 3790  |
| 18757  | 22352 |  | 2168         | 2030  |  | 9106       | 21100 |
| 14836  | 10875 |  | 8921         | 18178 |  | 10473      | 23782 |
| 19991  | 28590 |  |              |       |  | 17173      | 23796 |
| 10655  | 18211 |  |              |       |  | 14441      | 24138 |
| 14948  | 23956 |  |              |       |  | 6219       | 10661 |
|        |       |  |              |       |  |            |       |
