# Supplementary material for: Cytotoxic Function and Cytokine Production of Natural Killer Cells and Natural Killer T-Like Cells in Systemic Lupus Erythematosis Regulation with Interleukin-15
Source: Mediators Inflamm. 2019 Mar 31;2019:4236562. doi: 10.1155/2019/4236562 (PMC6462338; doi:10.1155/2019/4236562)
Supplement: Supplementary 6 — Figure 4(a): comparison of the percentages of IFN-γ expressing NK cells among normal controls (normal), SLE patients with inactive disease (inactive SLE), and SLE patients with active disease (active SLE) in the presence and absence of IL-15. [file 4236562.f6.pdf]

Figure 4(a)

IFN-gamma

| Normal |       |  | Inactive SLE |       |  | Active SLE |       |
|--------|-------|--|--------------|-------|--|------------|-------|
| Media  | IL-15 |  | Media        | IL-15 |  | Media      | IL-15 |
| 85.5   | 88.8  |  | 62.5         | 66.5  |  | 75.6       | 84.7  |
| 60.7   | 52.4  |  | 57.4         | 64    |  | 89.9       | 92.8  |
| 74.7   | 72.5  |  | 80.1         | 85.1  |  | 97.5       | 99.2  |
| 61.2   | 68.1  |  | 43.7         | 59.9  |  | 94.7       | 98.7  |
| 58     | 89.9  |  | 56.8         | 65.1  |  | 61.9       | 64.4  |
| 78     | 76.0  |  | 82.7         | 88.4  |  | 52.5       | 48    |
| 50.0   | 61.3  |  | 75.8         | 88.8  |  | 82.3       | 88.2  |
| 60.4   | 63.2  |  | 79           | 87.3  |  | 89.2       | 93.4  |
| 85.5   | 87.2  |  | 81.2         | 91    |  | 76.5       | 82.4  |
| 78.3   | 70.3  |  | 63.8         | 68.9  |  | 88.3       | 89.2  |
| 58.4   | 61.5  |  |              |       |  | 66.3       | 74.8  |
| 55.3   | 61.5  |  |              |       |  |            |       |
| 60.7   | 69.4  |  |              |       |  |            |       |
| 66.0   | 76.7  |  |              |       |  |            |       |
| 55.4   | 68.8  |  |              |       |  |            |       |
| 73.2   | 83.4  |  |              |       |  |            |       |
| 81.1   | 87.5  |  |              |       |  |            |       |
|        |       |  |              |       |  |            |       |
