# Supplementary material for: Cytotoxic Function and Cytokine Production of Natural Killer Cells and Natural Killer T-Like Cells in Systemic Lupus Erythematosis Regulation with Interleukin-15
Source: Mediators Inflamm. 2019 Mar 31;2019:4236562. doi: 10.1155/2019/4236562 (PMC6462338; doi:10.1155/2019/4236562)
Supplement: Supplementary 9 — Figure 5(b): comparison of the MFI of granzyme B of NKT-like cells from peripheral blood of SLE patients (active and inactive) and healthy controls (normal) in the presence and absence of IL-15. [file 4236562.f9.pdf]

Figure 5(b)

Granzyme B

| Normal |       |  | Inactive SLE |       |  | Active SLE |       |
|--------|-------|--|--------------|-------|--|------------|-------|
| Media  | IL-15 |  | Media        | IL-15 |  | Media      | IL-15 |
| 740    | 1014  |  | 1031         | 1856  |  | 1761       | 1863  |
| 989    | 1563  |  | 830          | 1088  |  | 1067       | 869   |
| 976    | 1621  |  | 1077         | 1295  |  | 856        | 1120  |
| 972    | 1116  |  | 1712         | 1864  |  | 1079       | 1108  |
| 715    | 692   |  | 719          | 1481  |  | 1367       | 965   |
| 727    | 818   |  | 617          | 756   |  | 875        | 971   |
| 900    | 670   |  | 954          | 1275  |  | 1782       | 1963  |
| 690    | 712   |  | 898          | 1153  |  | 2173       | 1443  |
| 990    | 1311  |  | 840          | 1039  |  | 1370       | 1636  |
| 1054   | 1605  |  | 548          | 1481  |  | 1069       | 1403  |
| 1186   | 1229  |  | 705          | 872   |  | 994        | 1145  |
| 729    | 936   |  | 957          | 830   |  | 1114       | 1128  |
|        |       |  | 1172         | 1249  |  | 883        | 1089  |
|        |       |  | 861          | 852   |  | 1185       | 1290  |
|        |       |  | 779          | 968   |  | 1673       | 1460  |
|        |       |  |              |       |  | 1100       | 1474  |
|        |       |  |              |       |  | 2759       | 1832  |
|        |       |  |              |       |  | 2548       | 2521  |
|        |       |  |              |       |  | 1051       | 1785  |
|        |       |  |              |       |  | 1201       | 1159  |
|        |       |  |              |       |  |            |       |
